# Supplementary material
Source: Elsevier journal article supplement (https://comptes-rendus.academie-sciences.fr/chimie/article/10.1016/j.crci.2012.11.014/file/attach/mmc1.pdf)

## Supporting Information

### Chlorotrimethylsilane Catalyzed Synthesis of 1,3-Diphenyl-2-Propenones and their Antimicrobial Activities

Progyashree Goswami<sup>a,b</sup>, Madhumita Talukdar<sup>b</sup>, Tarun C. Bora<sup>b</sup>, Prodeep Phukan<sup>a\*</sup> and Jadab C. Sarma<sup>b\*</sup>

(<sup>a</sup>Department of Chemistry, Gauhati University, Guwahati 781014, Assam, India)

(<sup>b</sup>CSIR- North-East Institute of Science and Technology, Jorhat 785006, Assam, India)

\*E-Mail: [pphukan@yahoo.com](mailto:pphukan@yahoo.com)

**Figure S1:**  $^1\text{H}$ -NMR spectra of synthesized chalcones.  $^{13}\text{C}$ -NMR spectra are provided only for new entries such as **6**, **7**, **8**, and **9**.

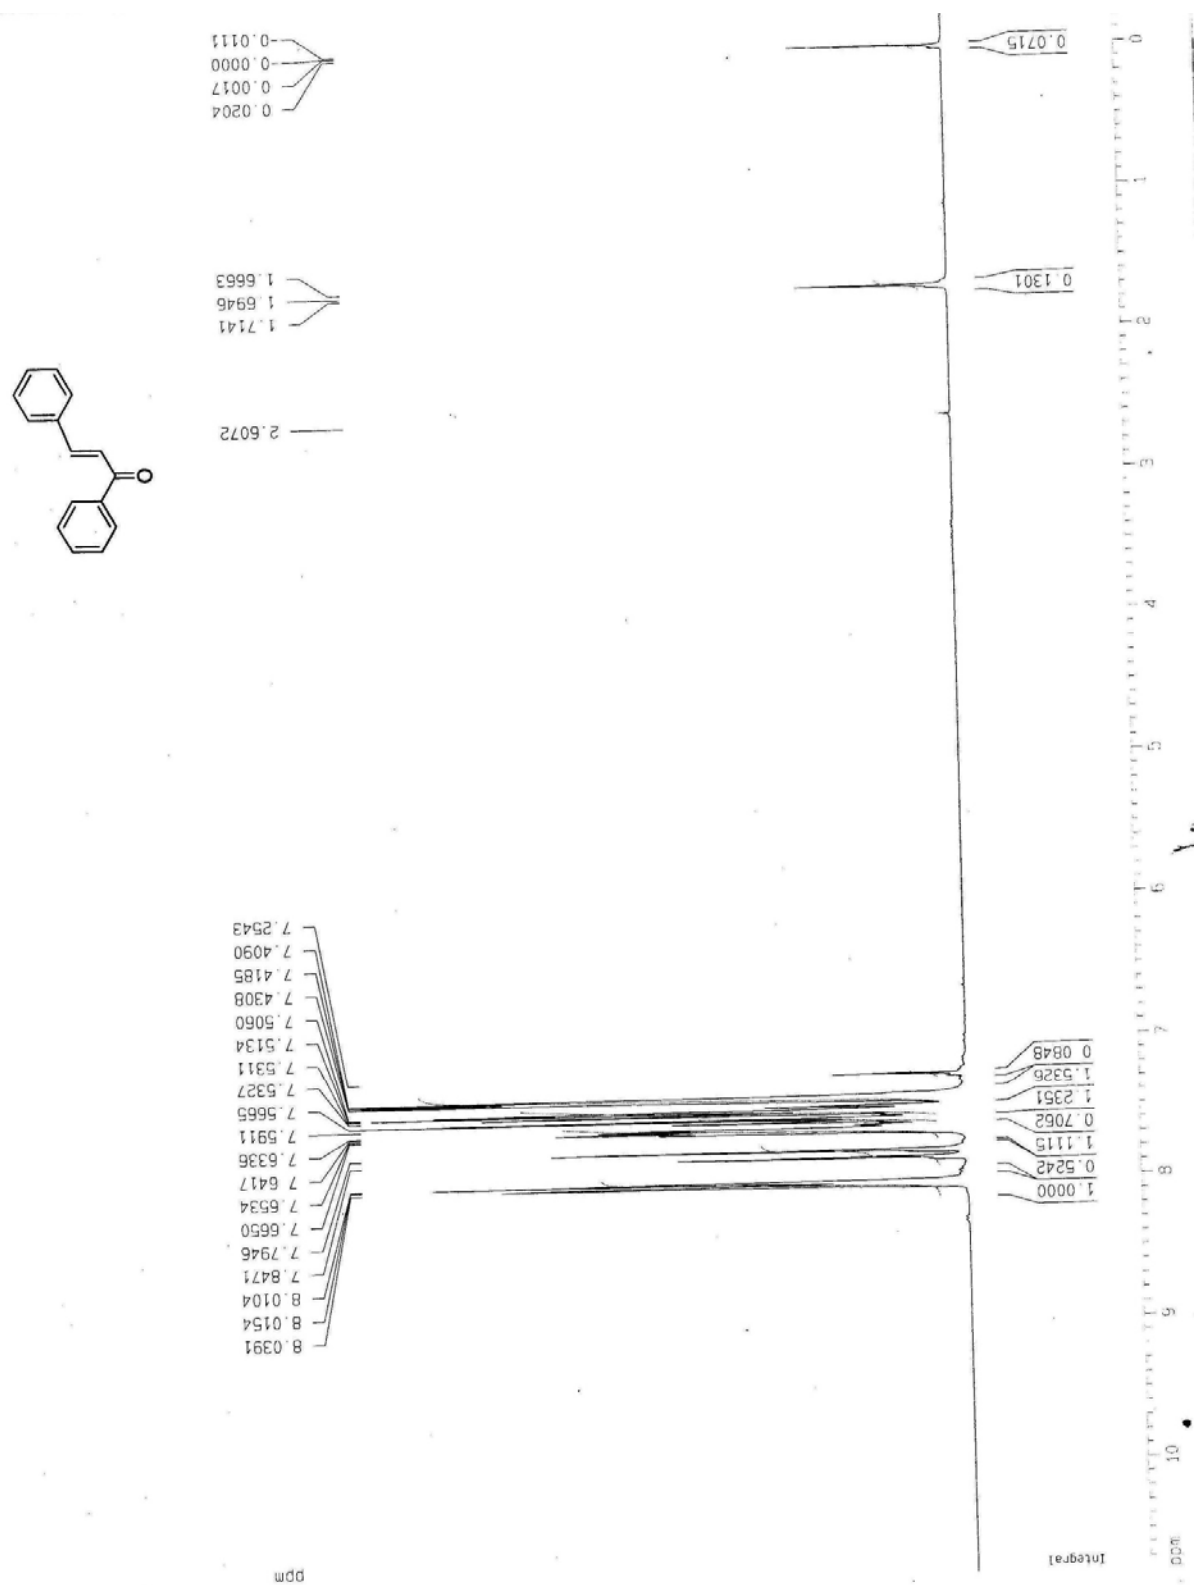

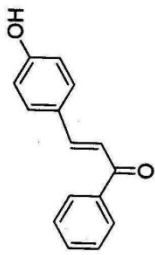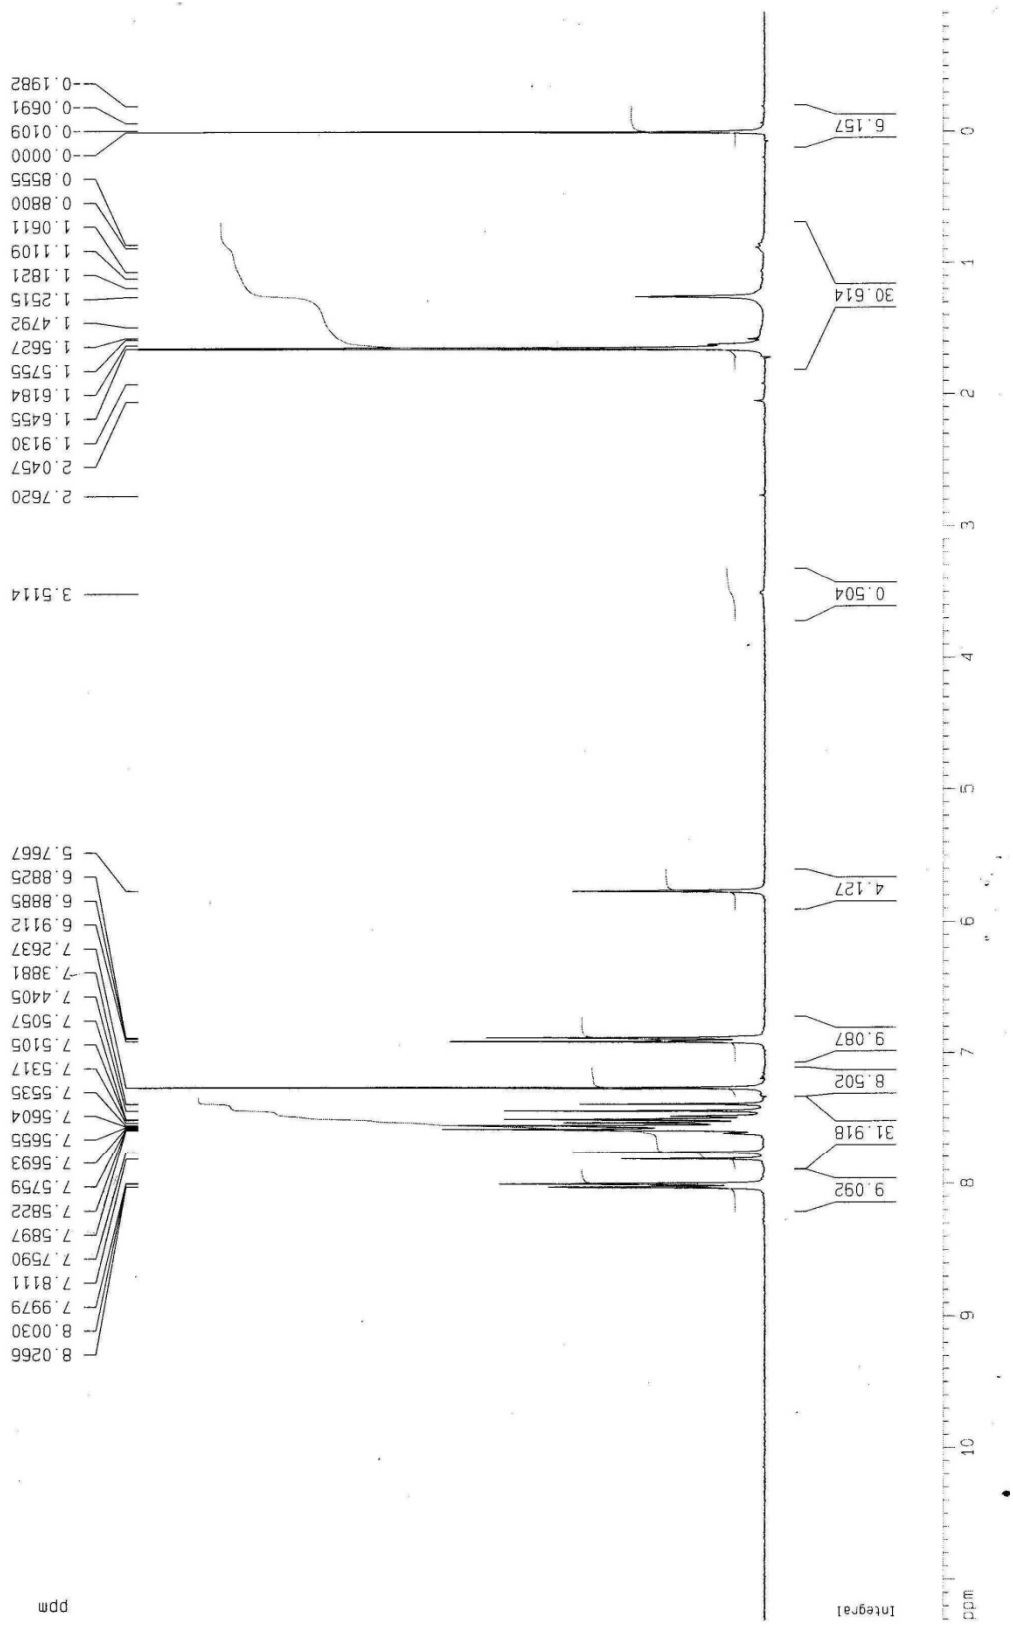

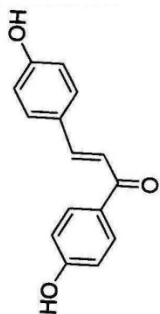

1.28799  
1.27304  
1.24927

2.02453

3.14762  
3.31627  
3.32110  
3.32624  
3.33159  
3.33662  
3.55889

4.65258  
4.92062

5.18464

6.84373  
6.87245  
6.88231  
6.89471  
6.90069  
6.91767  
6.92382  
7.04533  
7.56577  
7.60615  
7.61722  
7.63480  
7.70219  
7.75389  
7.82627  
7.85648  
7.86351  
7.88726  
7.99459  
8.00322  
8.00920  
8.03235

ppm

0.456

9.288

44.288

18.453

27.516

Integral

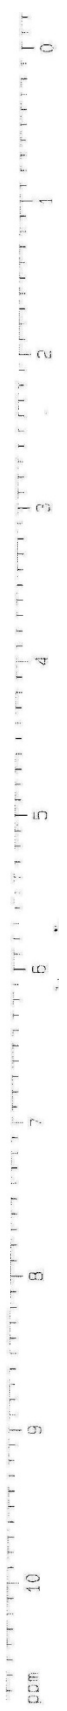

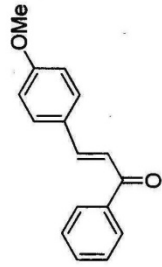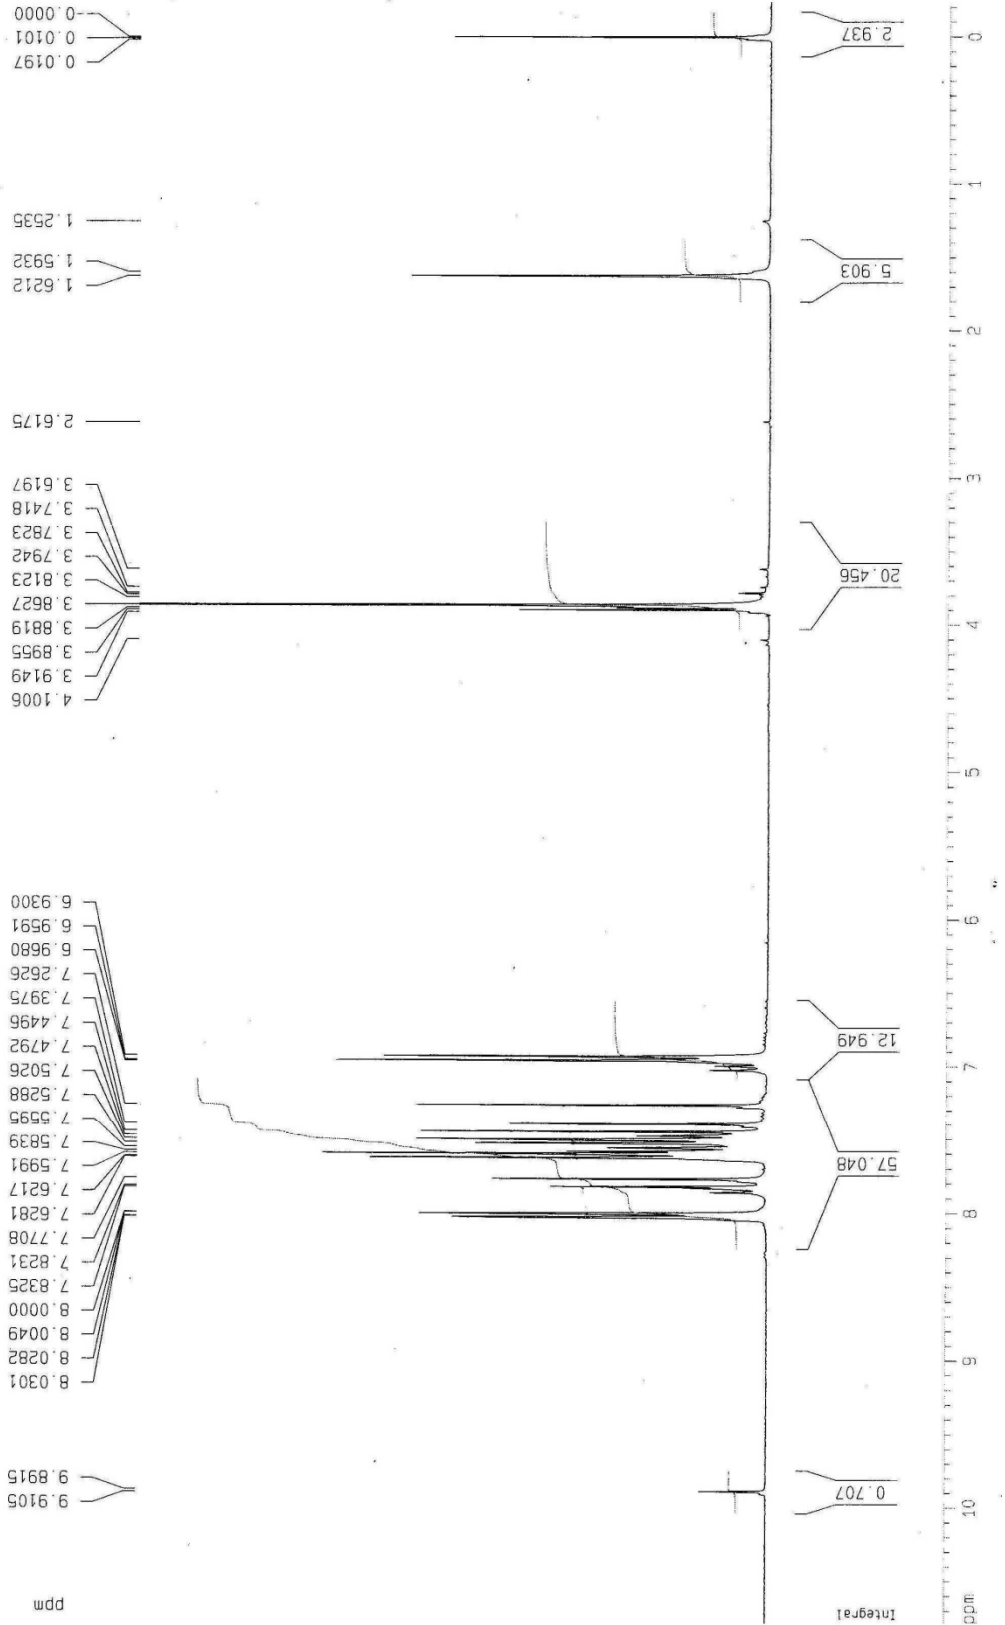

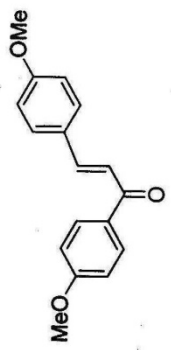

Chemical shift (ppm) values for the structure above:

- 3.89512, 3.86184
- 1.62505, 1.59605
- 0.01066, 0.00001
- 8.06681, 8.05770, 8.02836, 8.01958, 7.81577, 7.76383, 7.62604, 7.59691, 7.46815, 7.41631, 7.26470, 7.00908, 7.00030, 6.97083, 6.95597, 6.92682

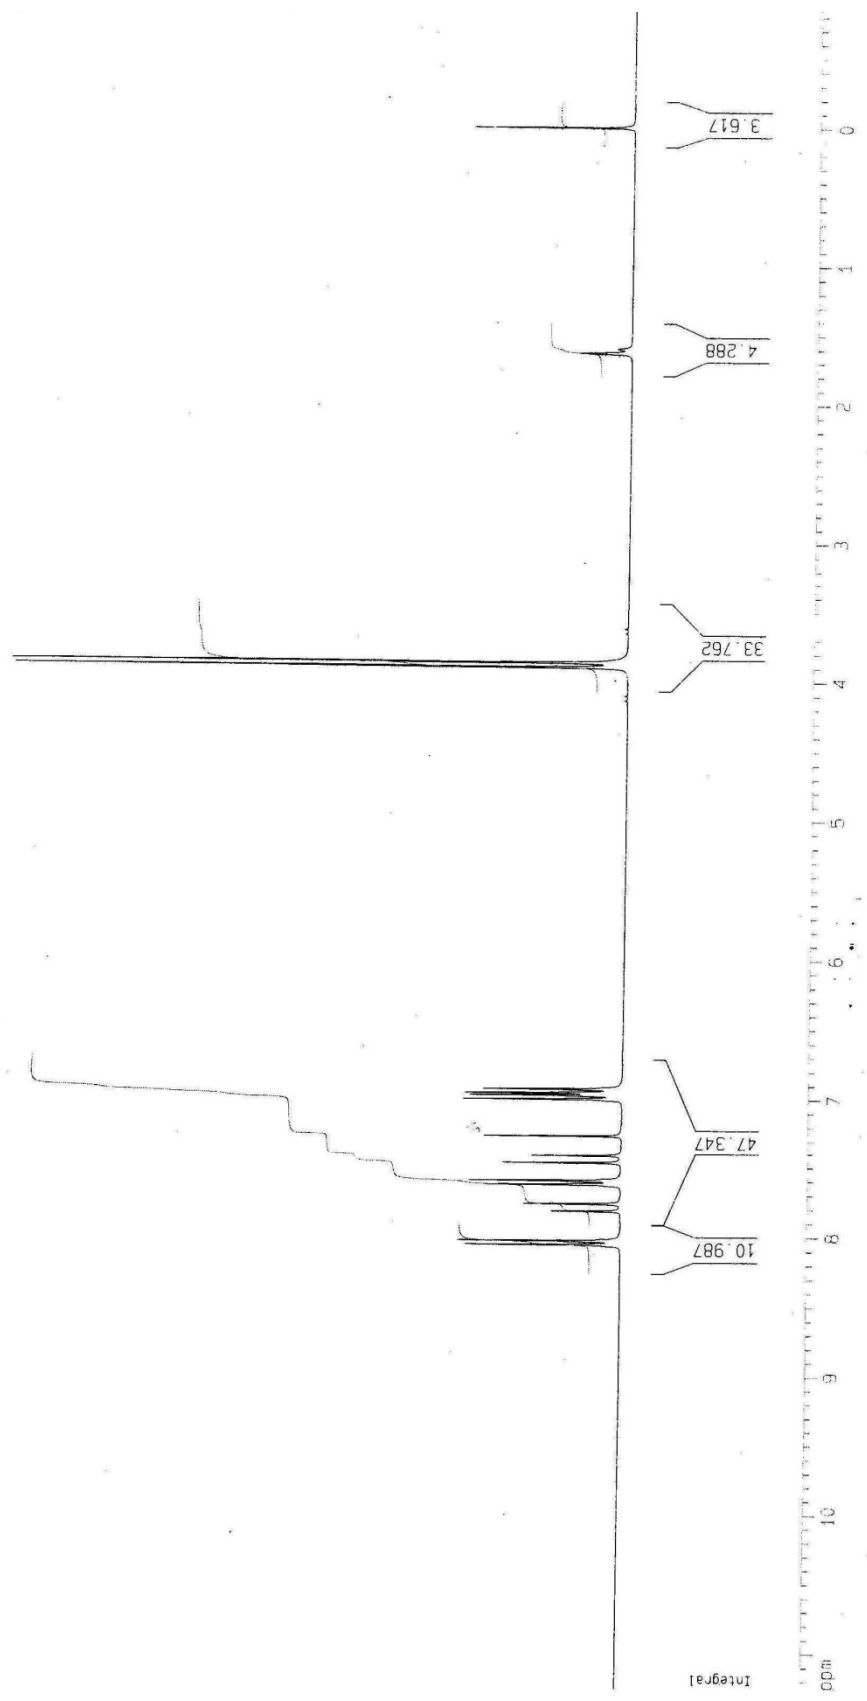

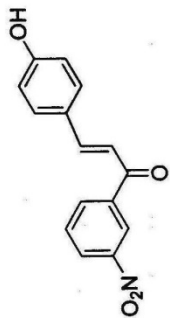

ppm

10.2440

8.8102

8.8044

8.7982

8.5952

8.5691

8.5014

8.4991

8.4942

8.4745

8.4717

8.4669

7.8952

7.8587

7.8603

7.8421

7.8217

7.8082

7.7972

7.7460

6.8714

6.8427

3.6726

3.5455

3.4962

3.4067

3.2745

3.1763

3.1599

2.8119

2.5061

2.5002

1.2193

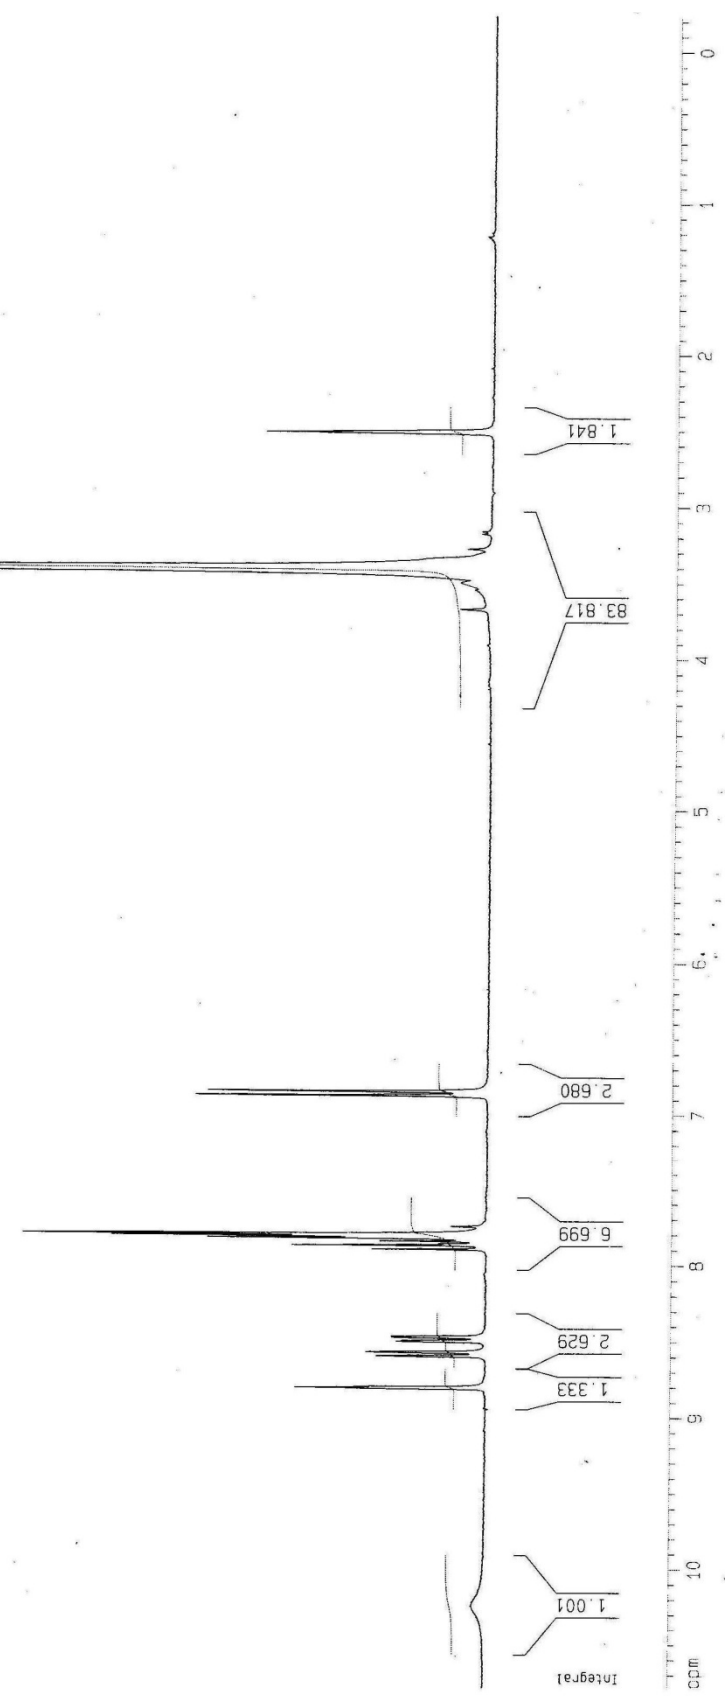

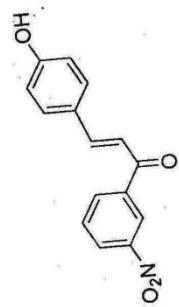

- 40.576
- 40.298
- 40.019
- 39.741
- 39.462
- 39.184
- 38.905

- 148.578
- 146.622
- 139.536
- 134.971
- 131.947
- 130.996
- 127.502
- 126.002
- 123.094
- 118.156
- 116.349

161.001

187.718

ppm

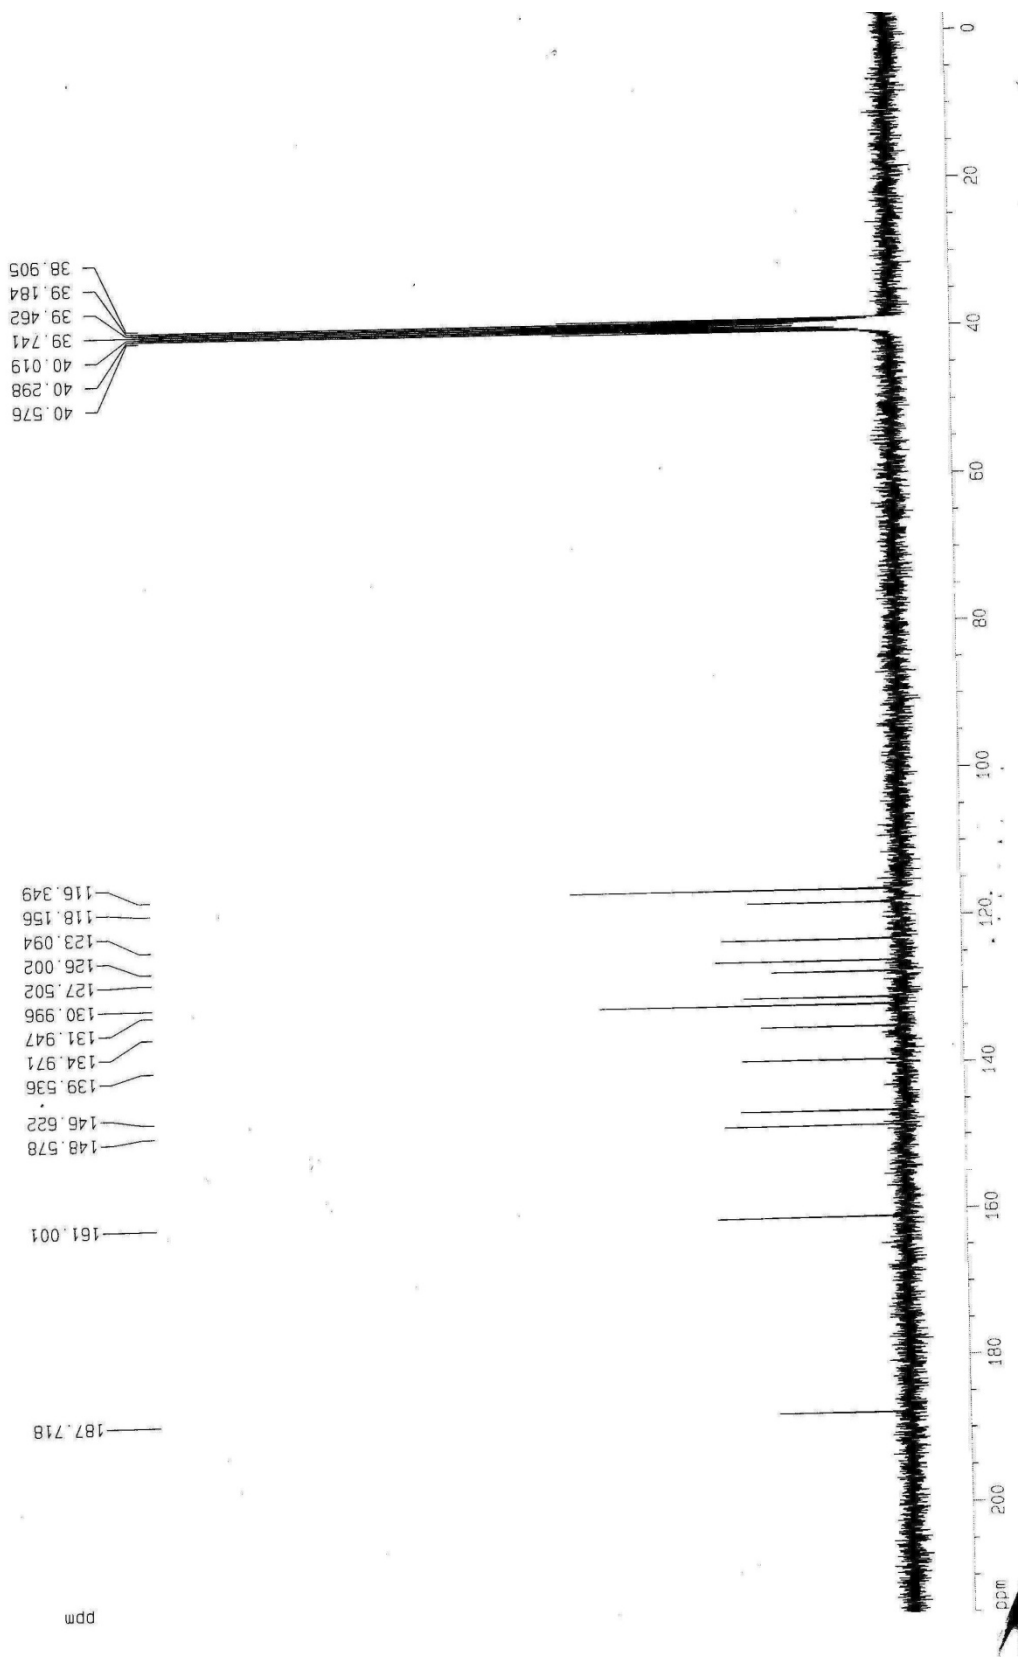



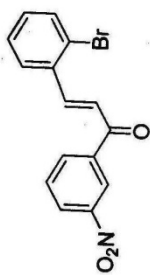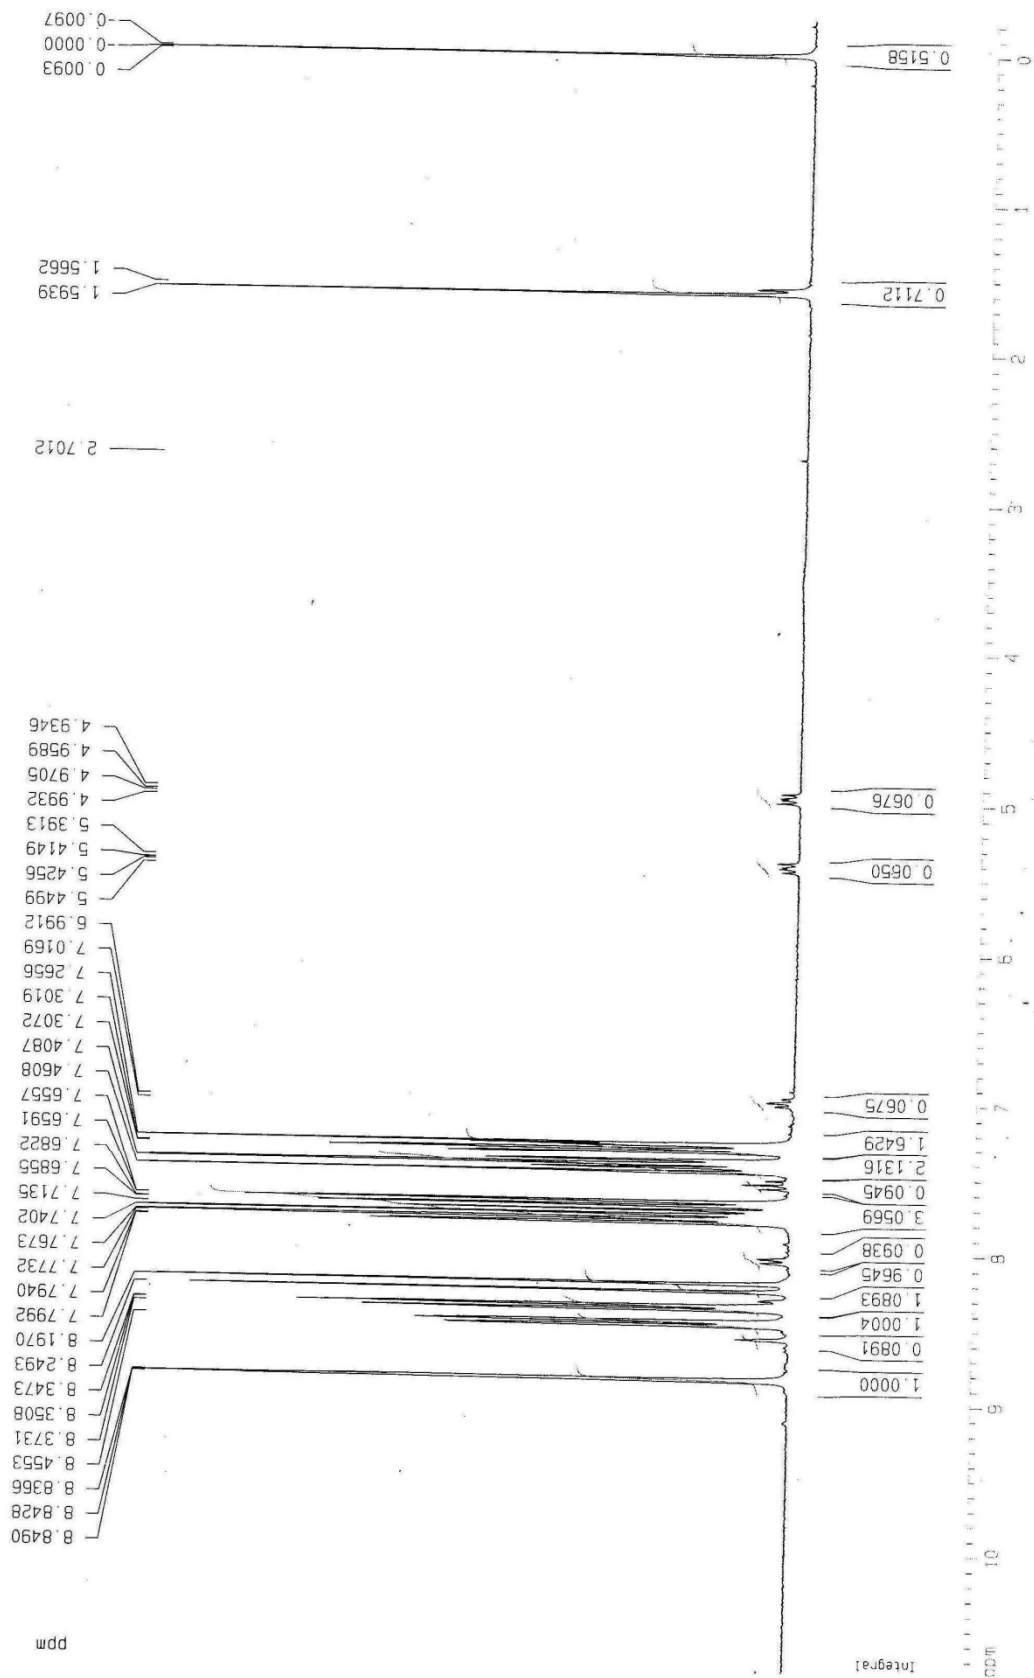

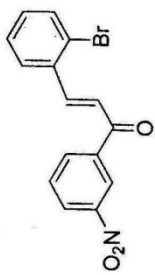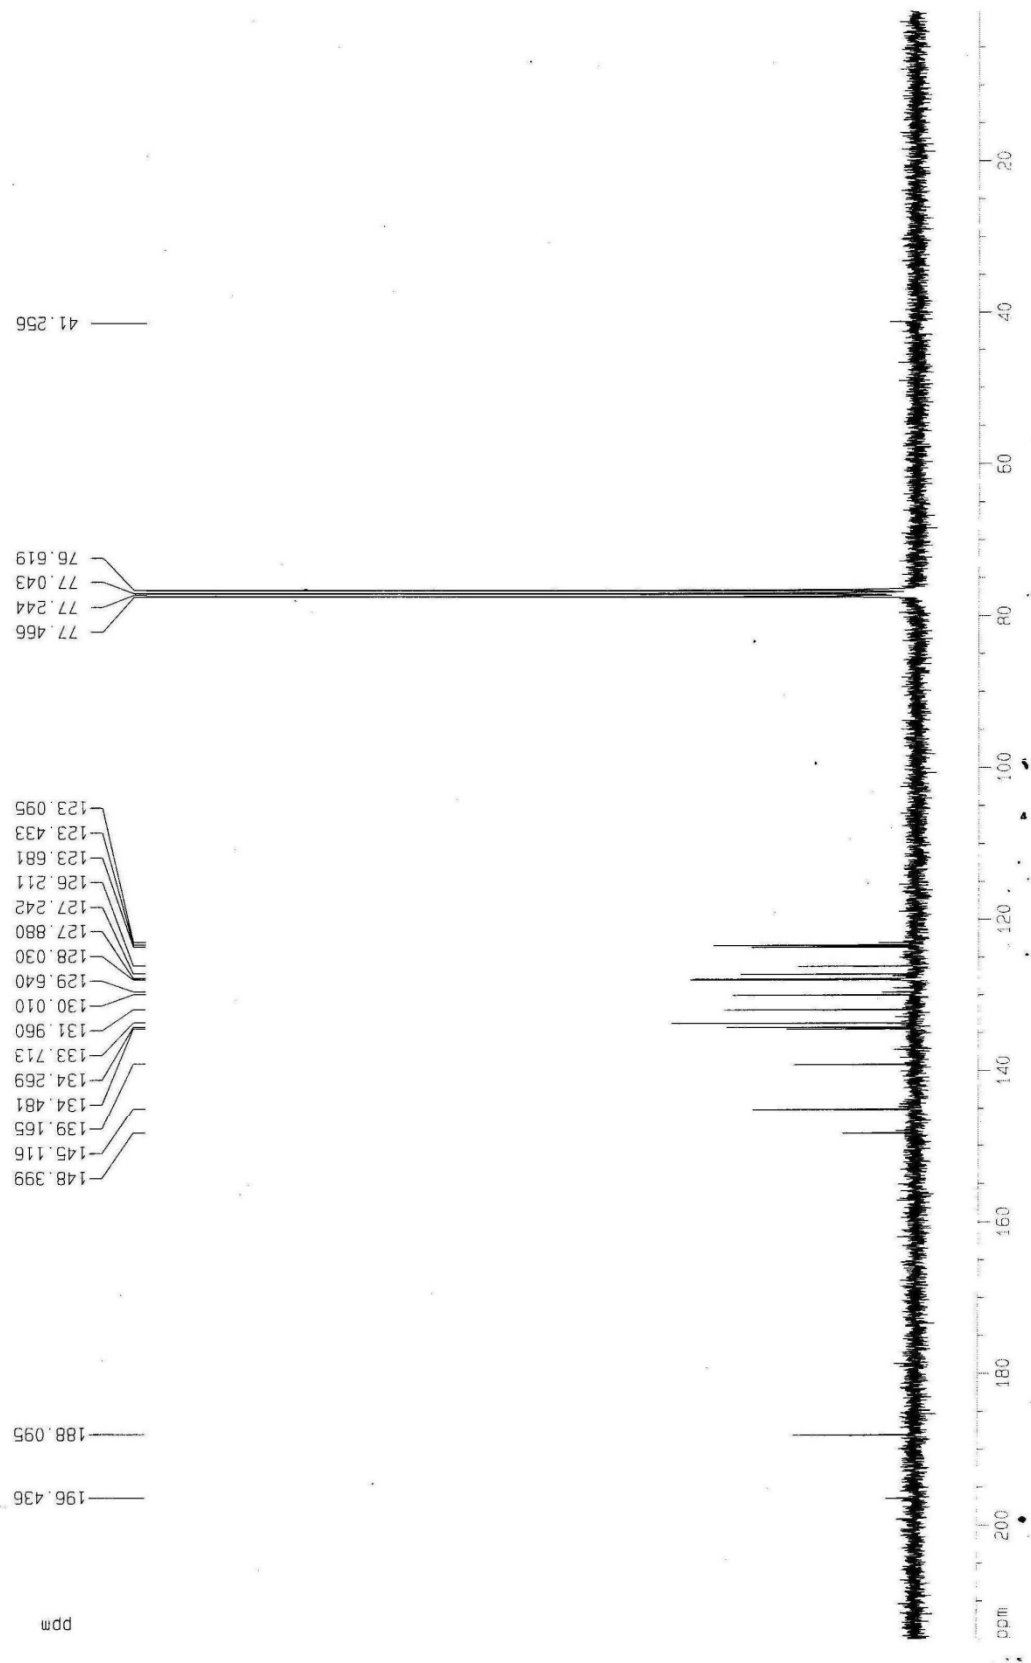

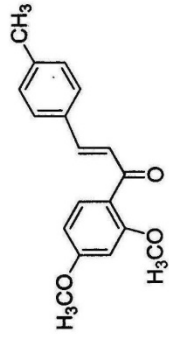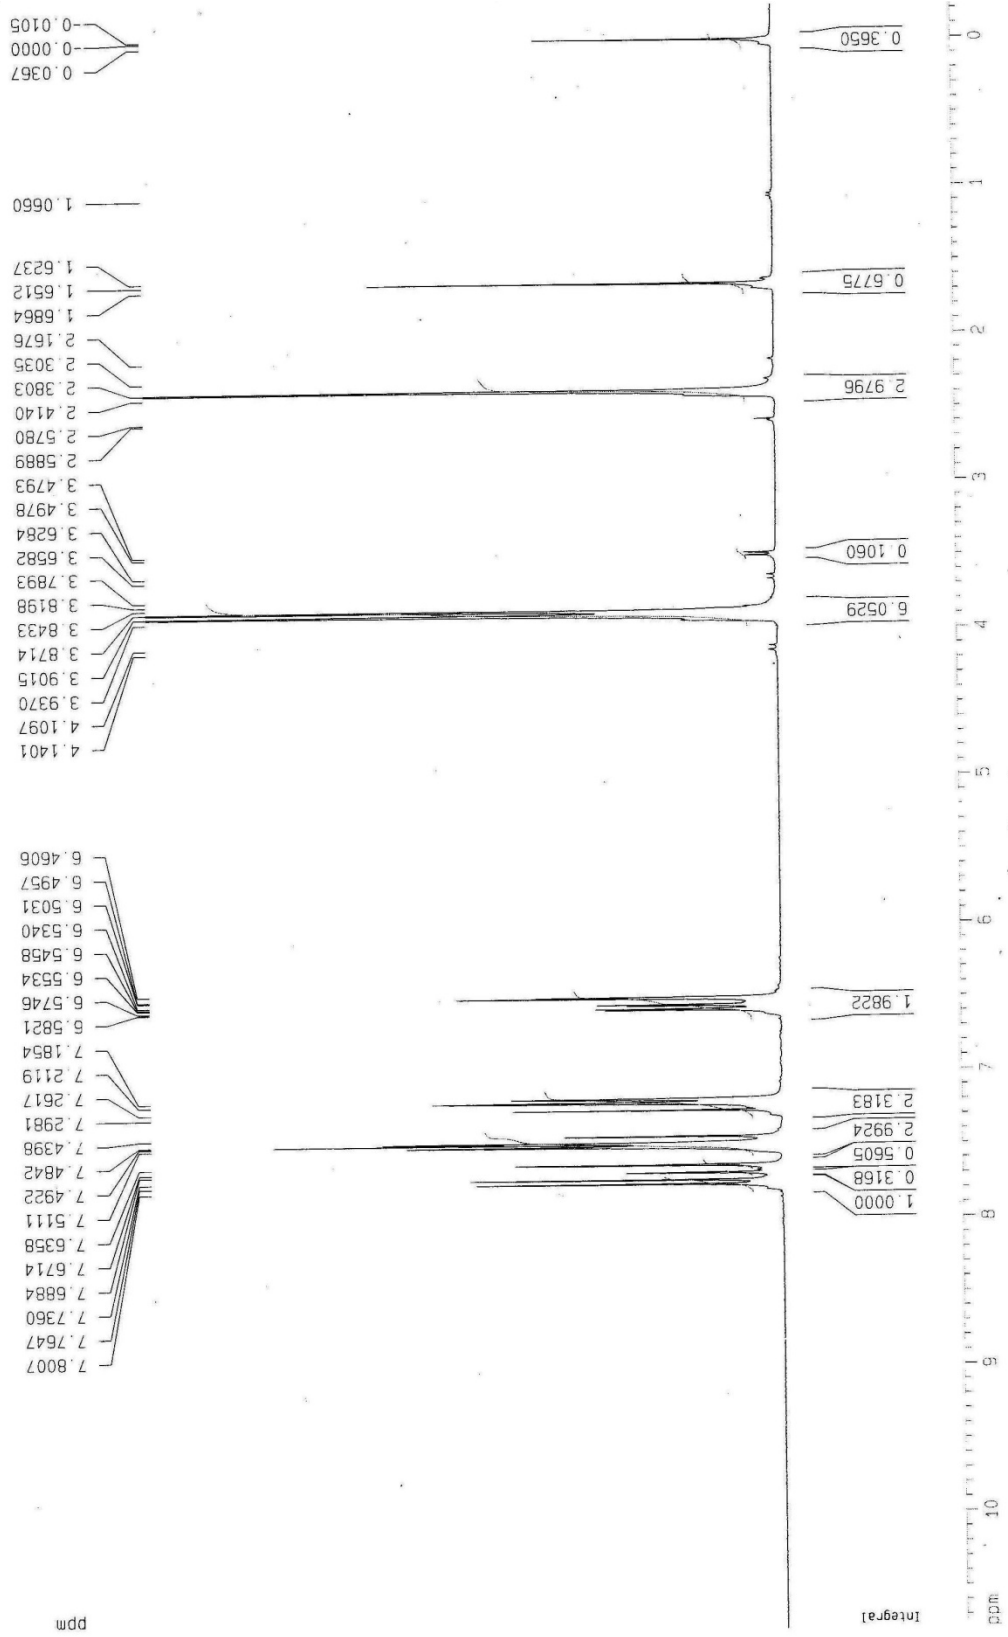

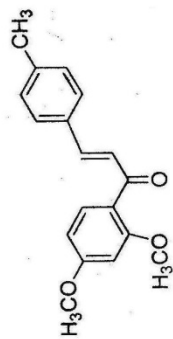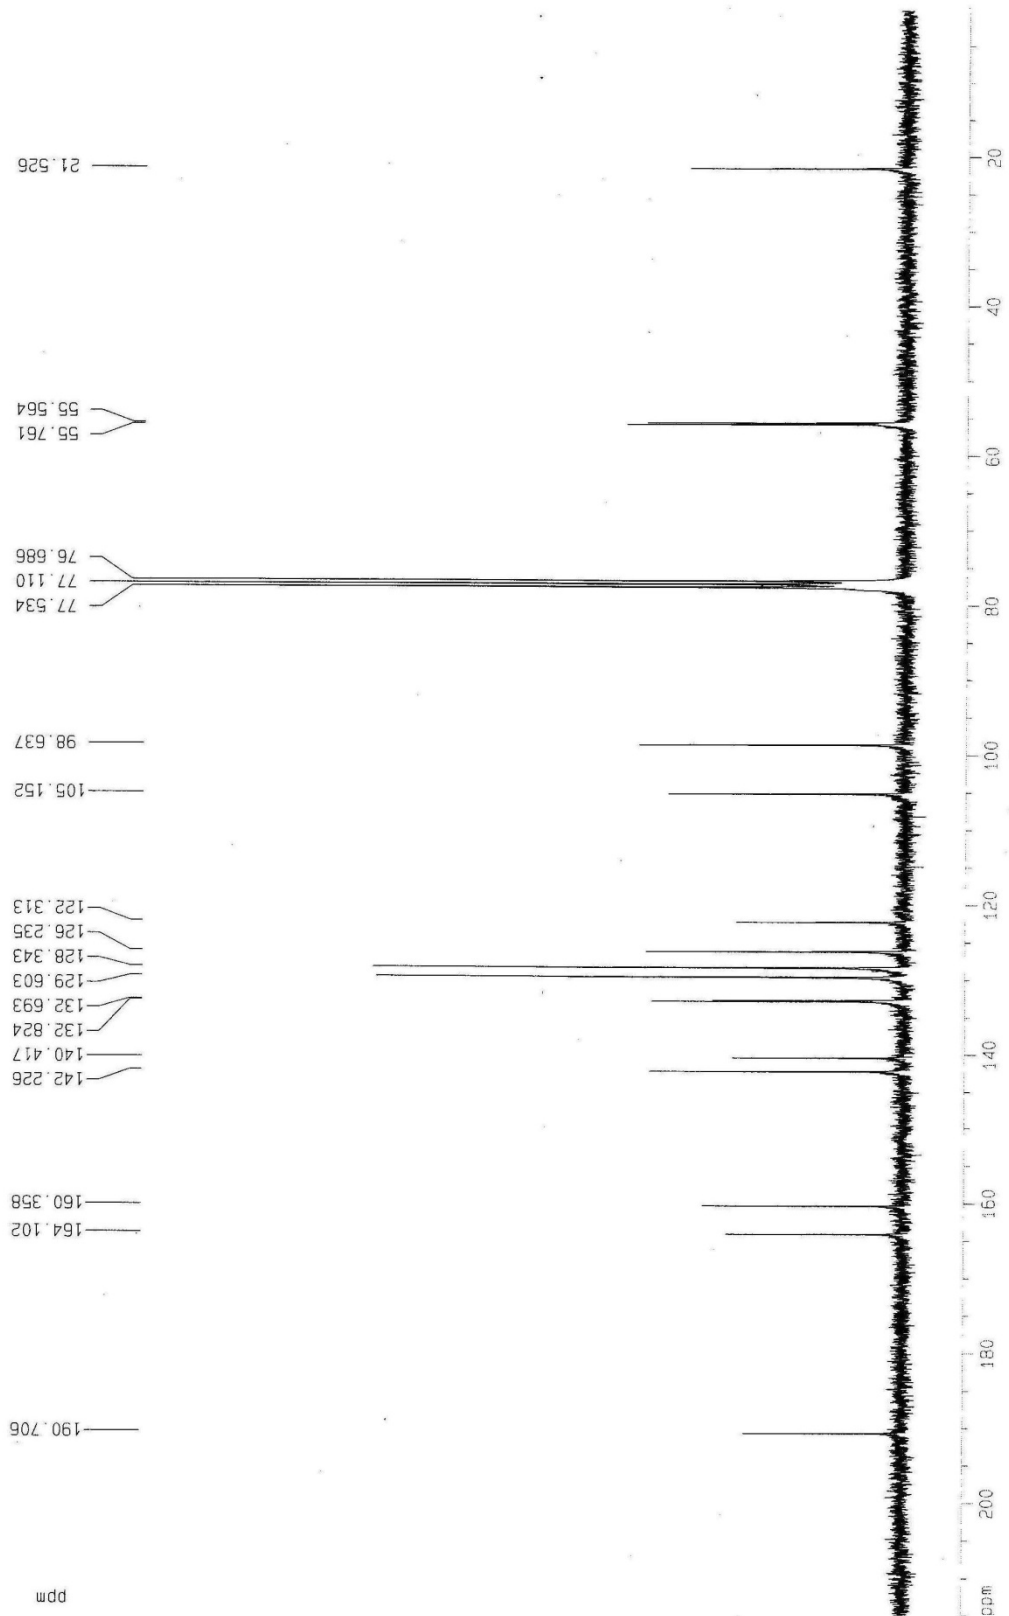

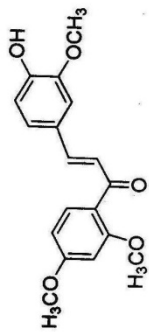

- 1.20703
- 1.22644
- 1.24764
- 2.00373
- 2.02013
- 3.14048
- 3.55137
- 3.57986
- 3.77199
- 3.79679
- 3.82347
- 3.83572
- 4.06305
- 4.08234
- 4.10547

- 6.45528
- 6.49443
- 6.51998
- 6.91907
- 6.94583
- 7.04349
- 7.10382
- 7.12958
- 7.18946
- 7.26913
- 7.32047
- 7.34123
- 7.39347
- 7.59438
- 7.64553
- 7.71212
- 7.74032

ppm

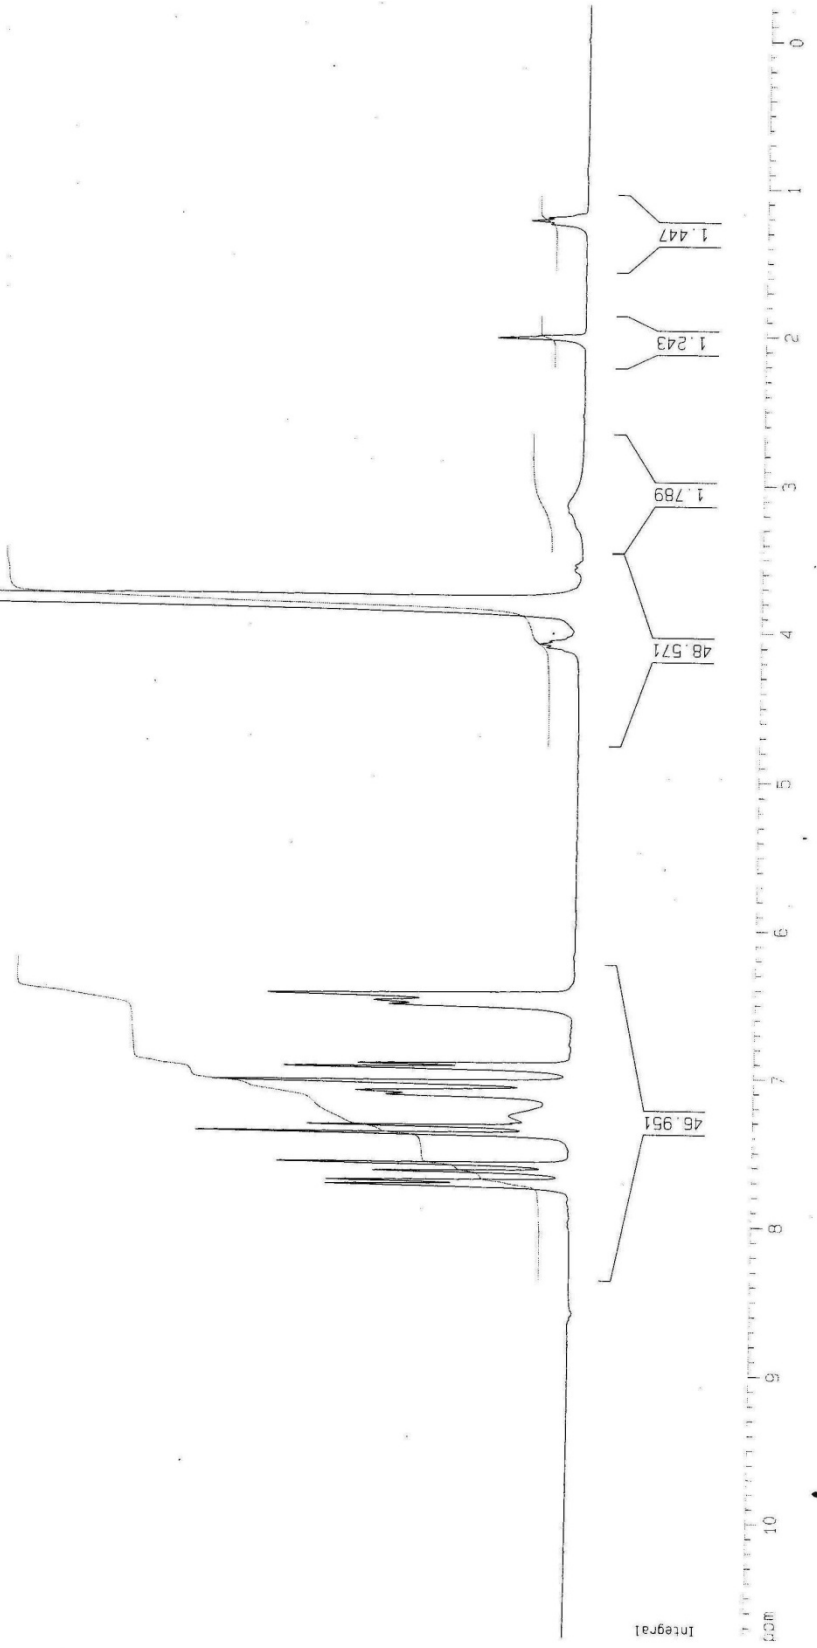

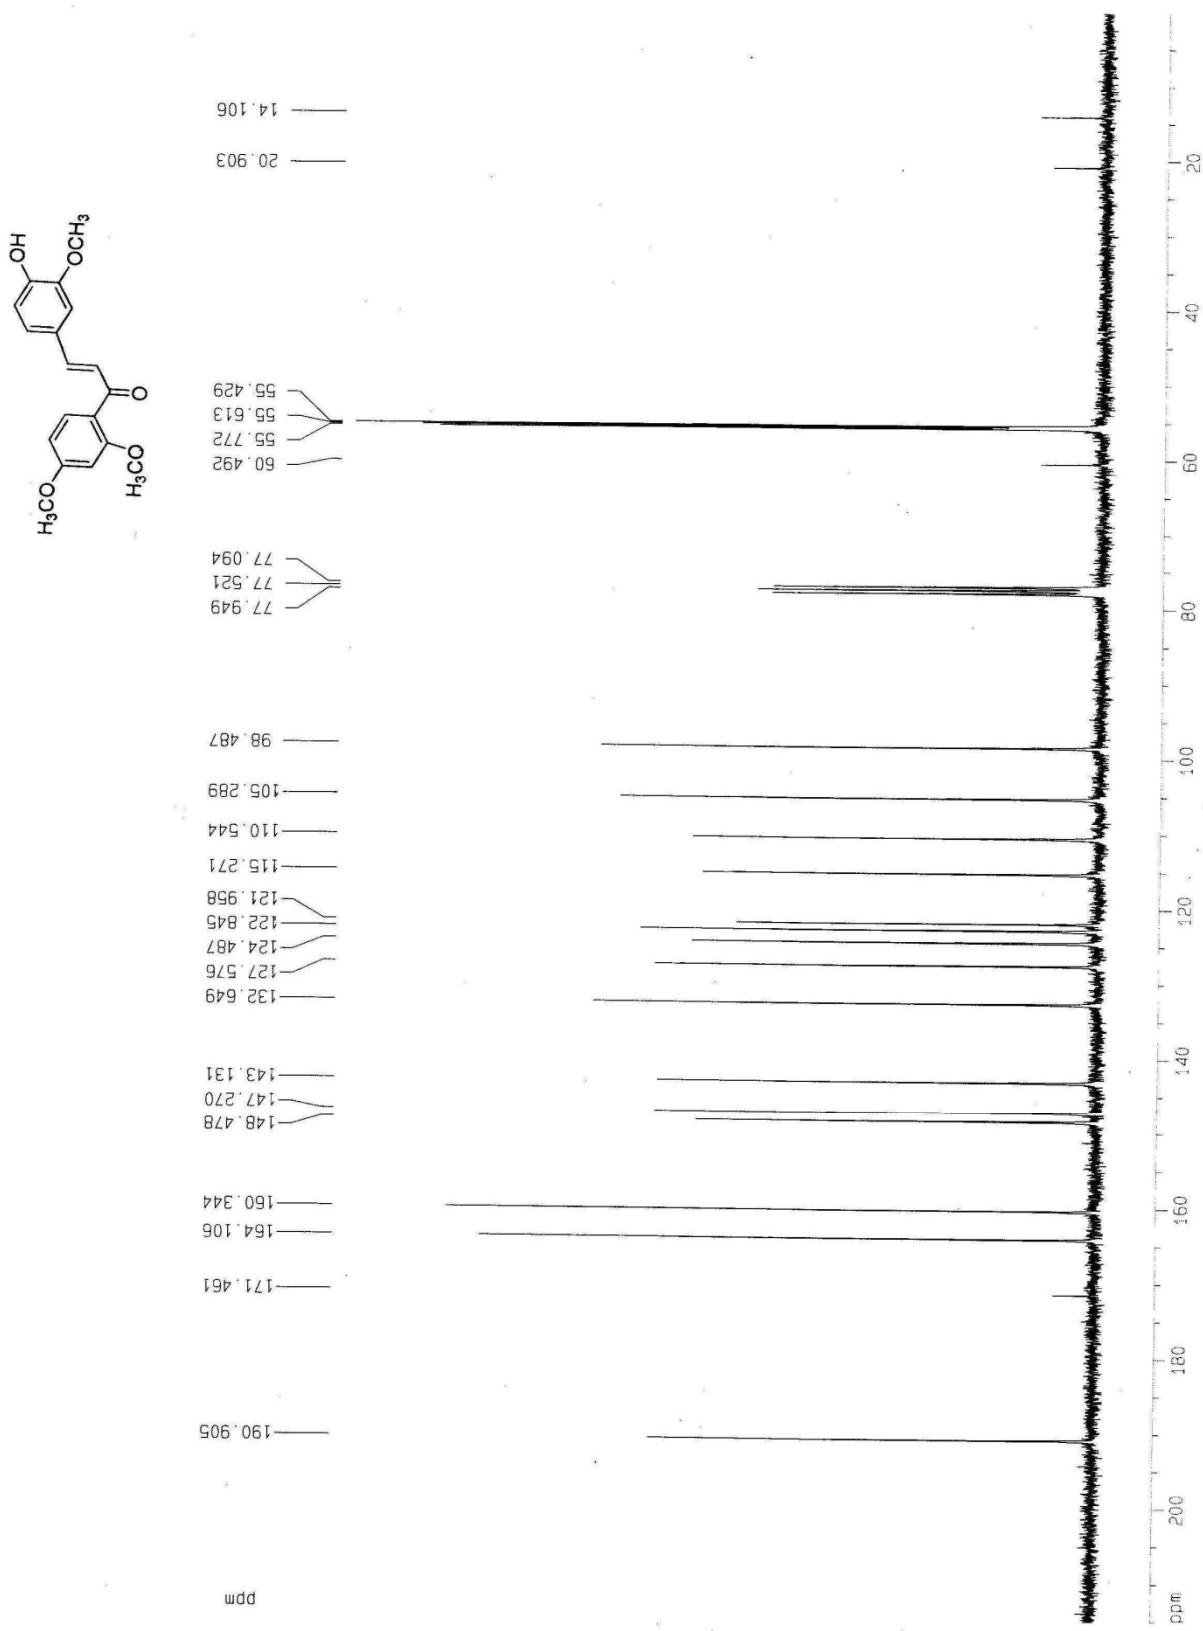

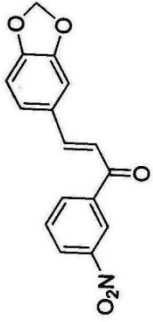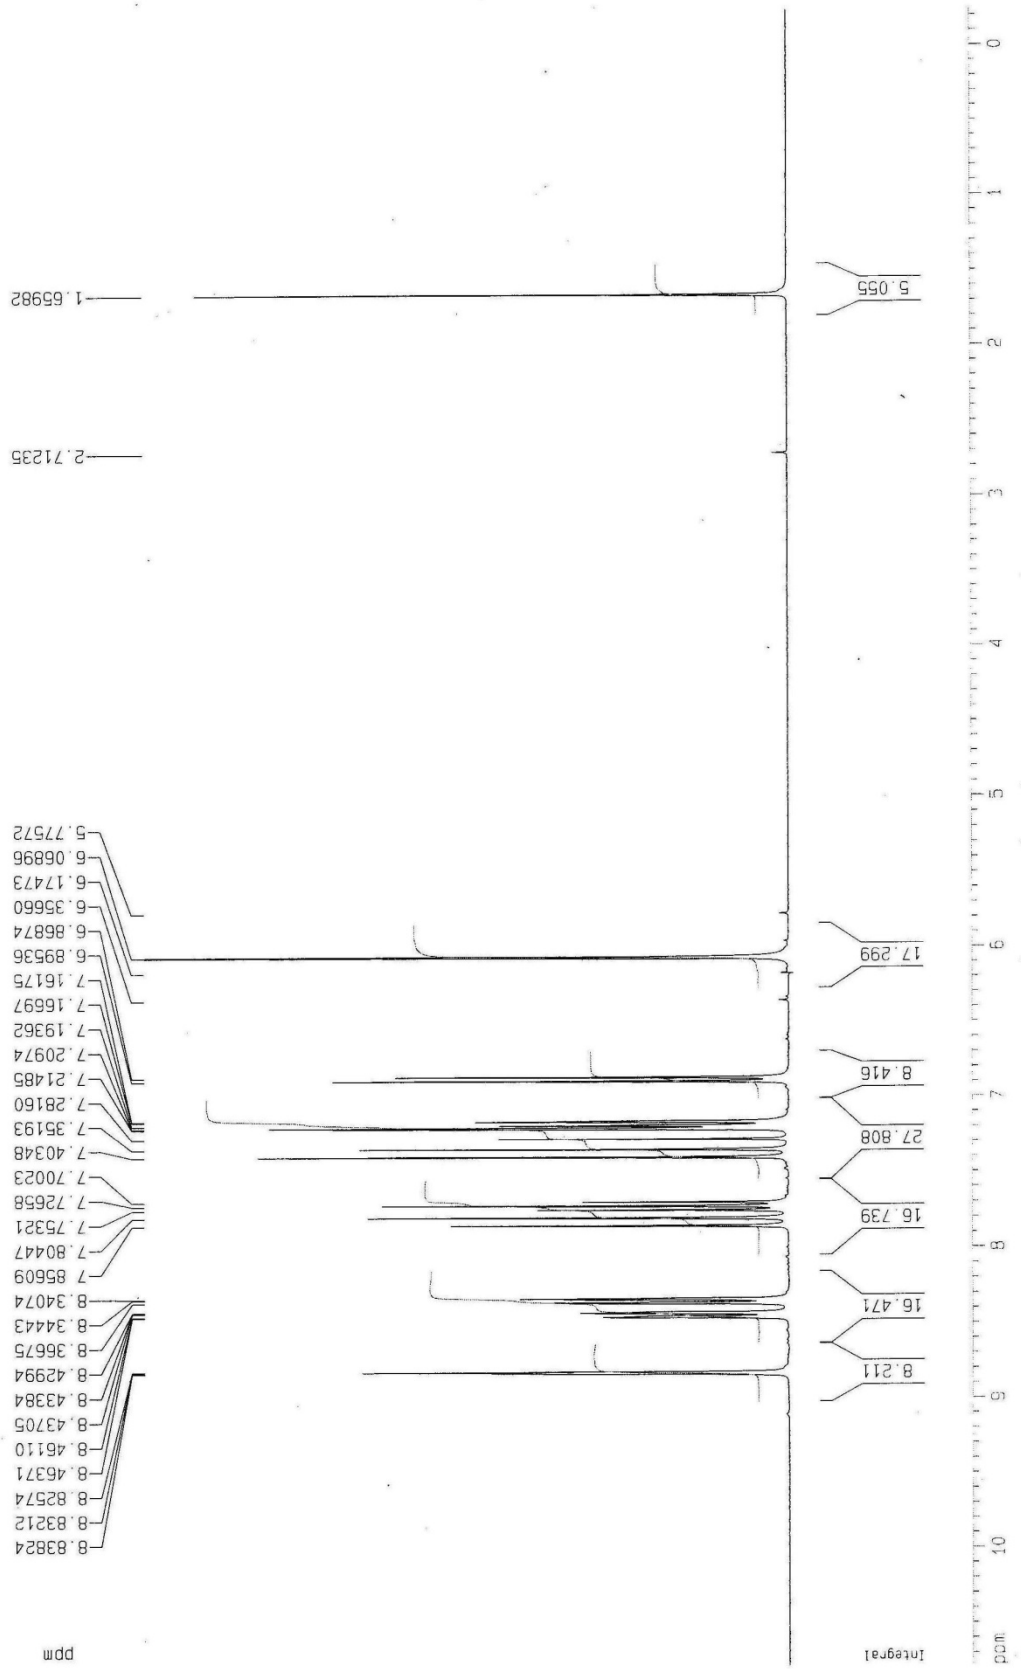

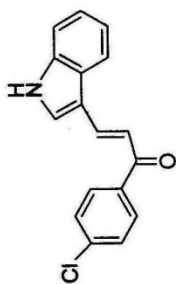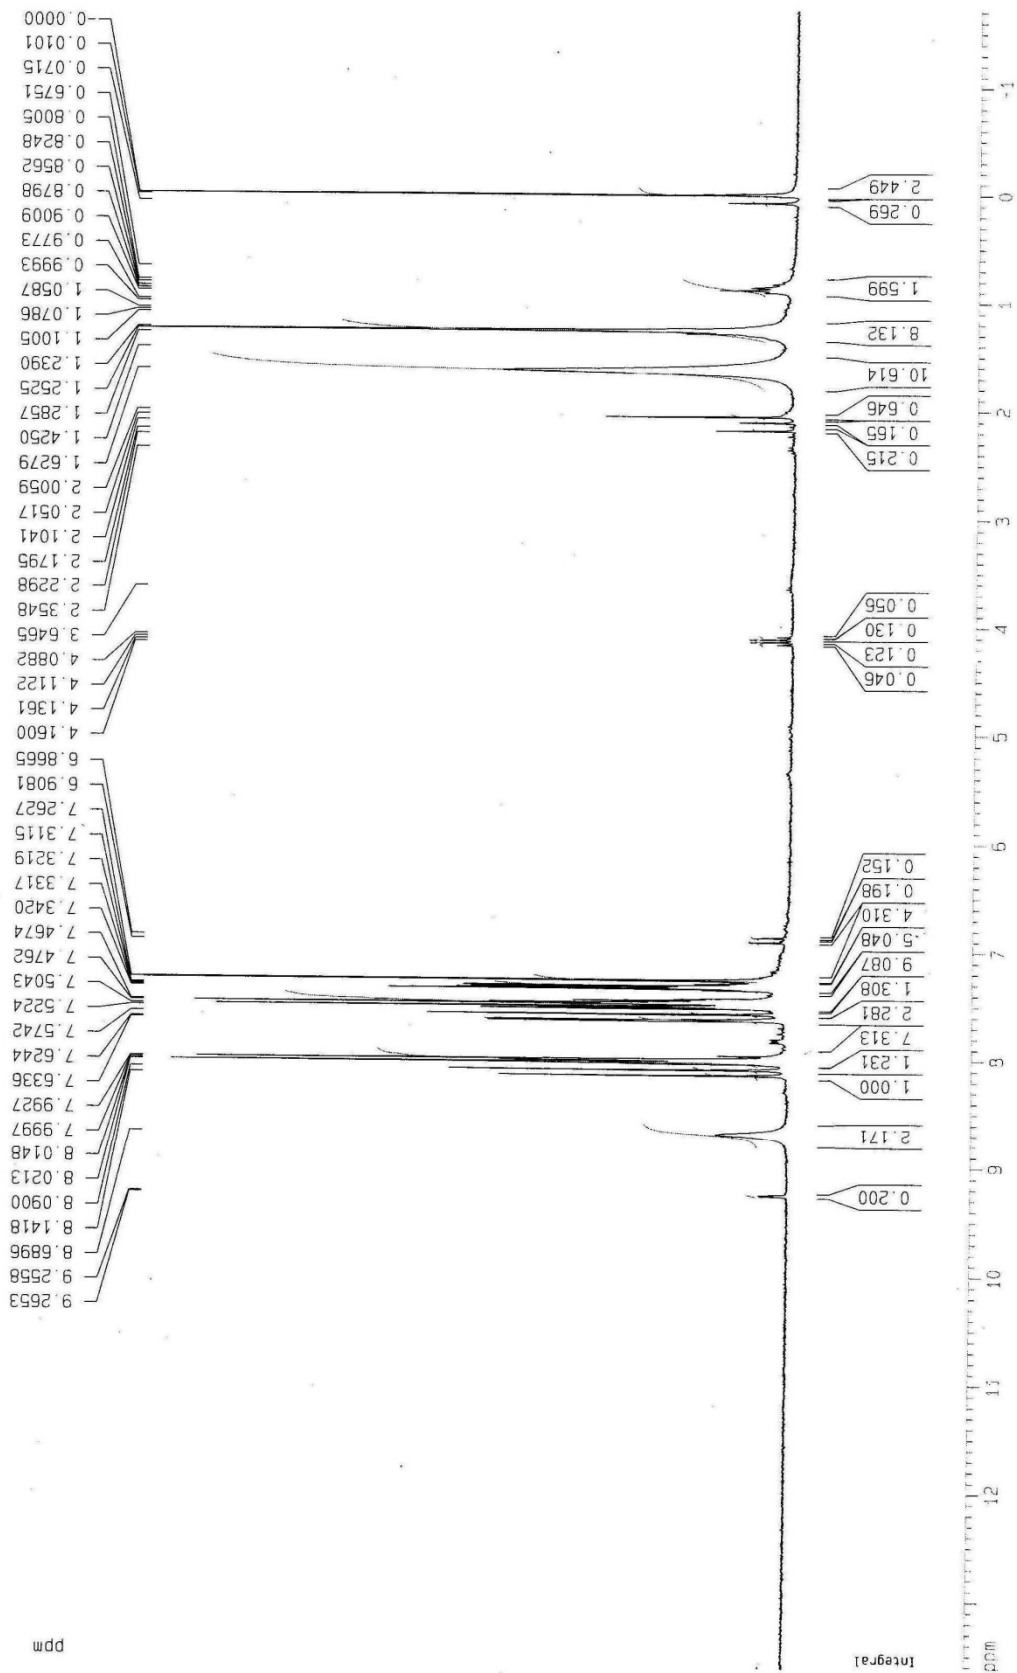



**Table S1:** Effects of substituent on 309.3 band of chalcone in methanol. The absorption wavelength of C=O, N=O and C=C groups in UV-vis spectroscopy show a bathochromic or red shift due to extended conjugation.

| No | Chalcone                                                                            | $\lambda$ (nm) | Absorption |
|----|-------------------------------------------------------------------------------------|----------------|------------|
| 1  | 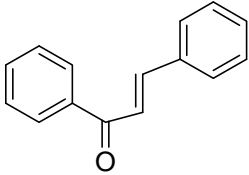   | 309.3          | 2.2540     |
|    |                                                                                     | 227.3          | 1.0048     |
|    |                                                                                     | 206.7          | 1.3688     |
| 2  |    | 344.3          | 2.3606     |
|    |                                                                                     | 247.3          | 1.2585     |
|    |                                                                                     | 206.7          | 1.4253     |
| 3  |   | 348.2          | 1.0429     |
|    |                                                                                     | 235.3          | 0.4436     |
|    |                                                                                     | 204.3          | 0.4999     |
| 4  |  | 341.5          | 0.8120     |
|    |                                                                                     | 245.5          | 0.4160     |
|    |                                                                                     | 203.0          | 0.7440     |
| 5  |  | 343.5          | 0.7546     |
|    |                                                                                     | 233.7          | 0.3324     |
|    |                                                                                     | 204.3          | 0.3391     |
| 6  |  | 357.5          | 0.9440     |
|    |                                                                                     | 245.5          | 0.9520     |
|    |                                                                                     | 203.0          | 0.7400     |
| 7  |  | 304.5          | 0.1370     |
|    |                                                                                     | 232.0          | 0.4300     |
|    |                                                                                     | 204.5          | 0.5340     |

|    |                                                                                    |       |        |
|----|------------------------------------------------------------------------------------|-------|--------|
| 8  | 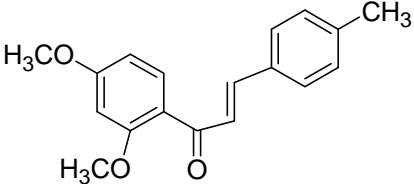  | 328.3 | 0.5384 |
|    |                                                                                    | 230.5 | 0.2893 |
|    |                                                                                    | 205.9 | 0.6124 |
| 9  |   | 362.5 | 1.6712 |
|    |                                                                                    | 246.5 | 0.8063 |
|    |                                                                                    | 209.1 | 1.9045 |
| 10 |   | 368.1 | 0.1253 |
|    |                                                                                    | 244.8 | 0.1439 |
|    |                                                                                    | 211.5 | 0.1551 |
|    |                                                                                    | 197.9 | 0.1346 |
| 11 |  | 392.0 | 0.097  |
|    |                                                                                    | 267.5 | 0.072  |
|    |                                                                                    | 219.0 | 0.114  |

---

**Figure S2:** (a) Molecular packing diagram of **6** via O–H···O hydrogen bonds along *b*-axis.

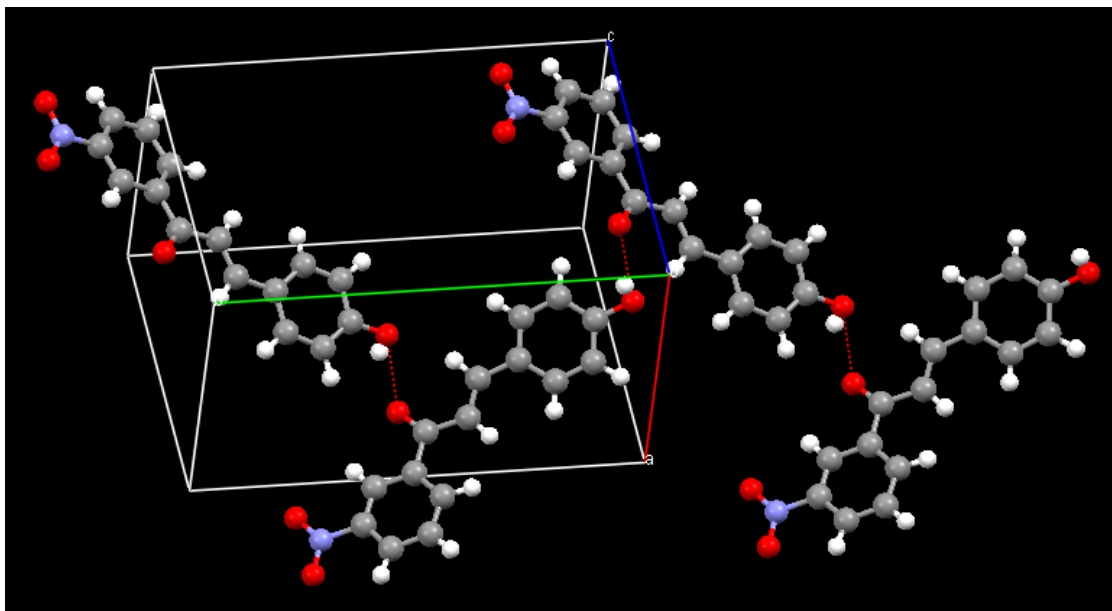

**Figure S2:** (b) Molecular packing diagram of **7**. The C–H···O hydrogen bond between NO<sub>2</sub> and C–H of phenyl ring held molecules together in the crystal.

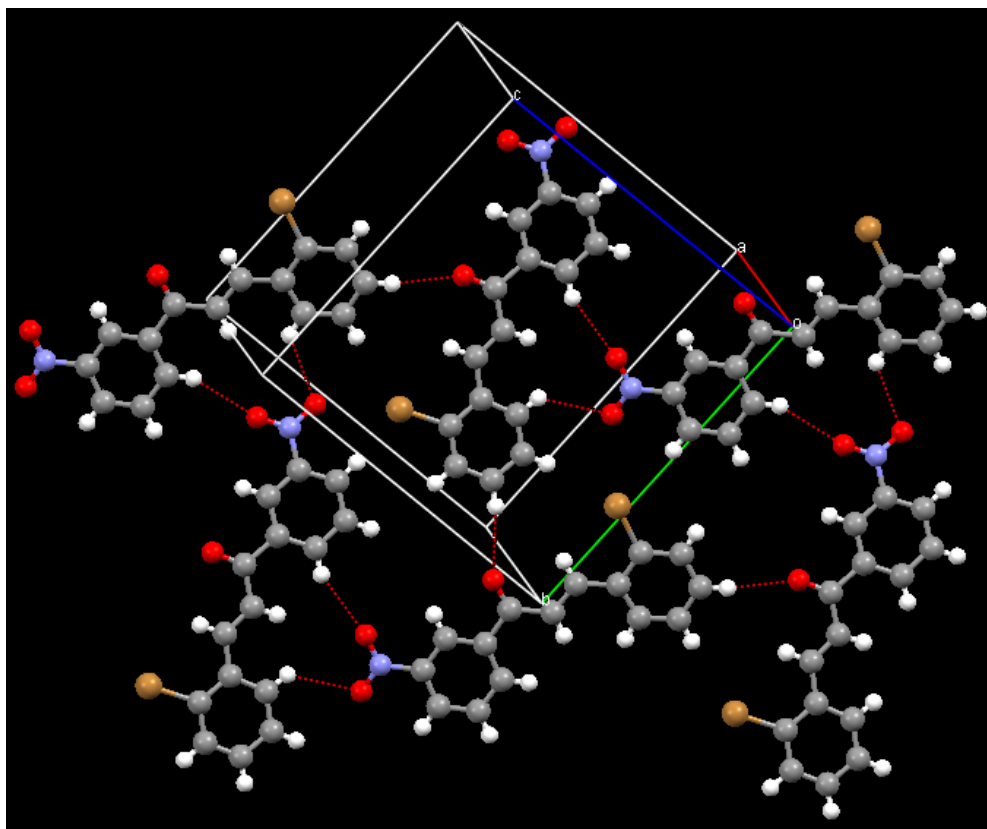

**Figure S2:** (c) Molecules are arranged in **8** via C–H···O hydrogen bonds. Ketone and ether group oxygen acts as hydrogen bond acceptor.

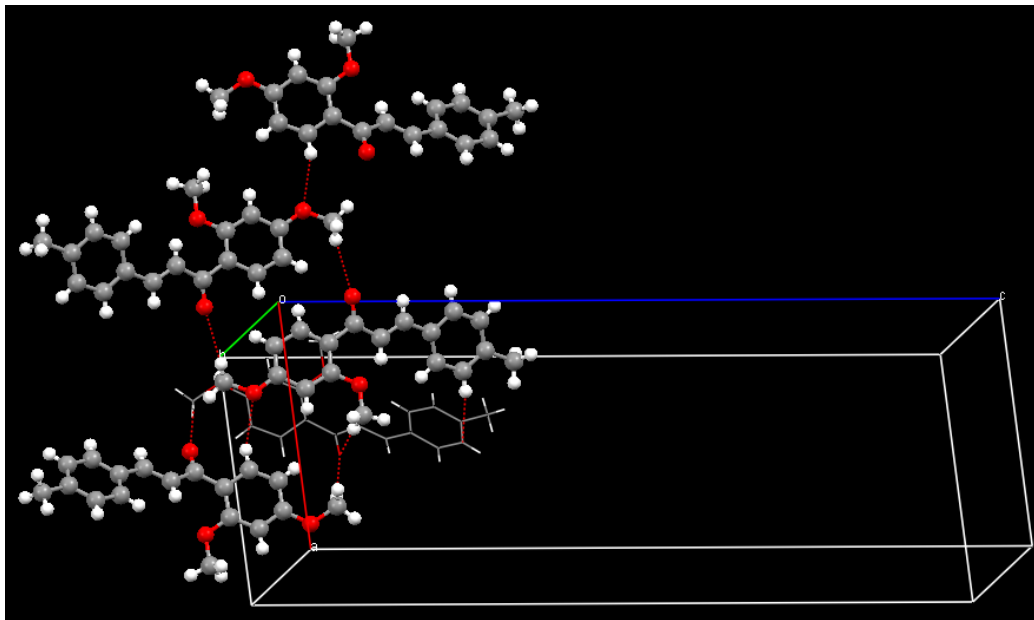

**Figure S2:** (d) In **10** molecules are arranged via C–H···O hydrogen bonds. Oxygen from piperinol ring, NO<sub>2</sub> and C=O groups are involved in hydrogen bonding.

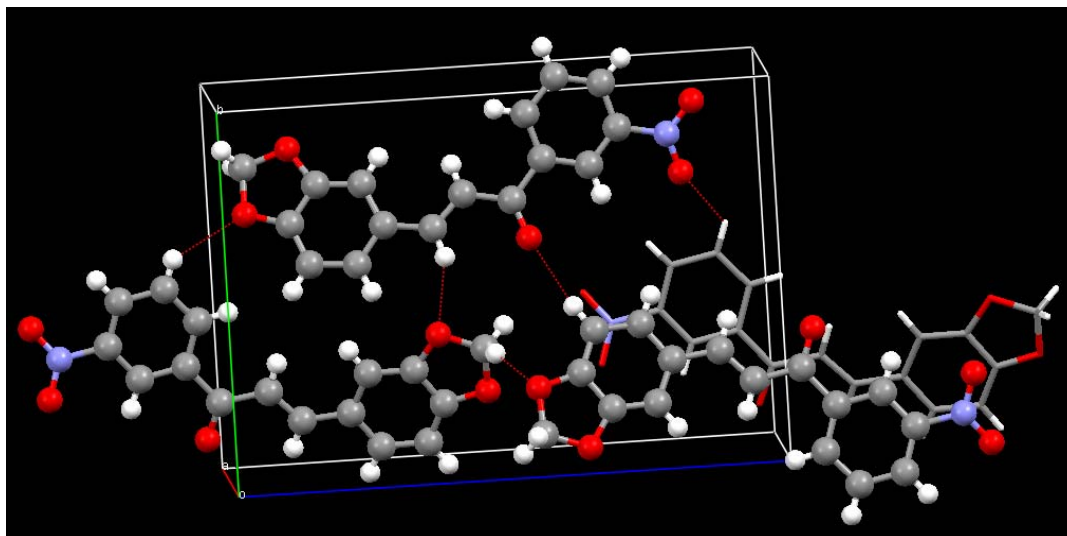

Supplement: mmc1 [file mmc1.pdf]
